# Supplementary material for: Characterization and Comparative Analysis of Complete Chloroplast Genomes of Three Species From the Genus Astragalus (Leguminosae)
Source: Front Genet. 2021 Aug 5;12:705482. doi: 10.3389/fgene.2021.705482 (PMC8378255; doi:10.3389/fgene.2021.705482)
Supplement: Supplementary file 1 [file Data_Sheet_1.xlsx]

## Sheet: Table S1
Table S1 Location and length of intron-containing genes in three Astragalus species
Astragalus mongholicus var. dahuricus										Astragalus melilotoides										Astragalus adsurgens
Gene	Strand	Start	End	ExonI	IntronI	ExonII	IntronII	ExonIII		Gene	Strand	Start	End	ExonI	IntronI	ExonII	IntronII	ExonIII		Gene	Strand	Start	End	ExonI	IntronI	ExonII	IntronII	ExonIII
trnL-UAA	-	13253	13890	36	551	51				trnL-UAA	-	13248	13885	36	551	51	753	153		trnL-UAA	-	13513	13932	36	333	51
ycf3	+	16485	18439	115	705	230	752			ycf3	+	16492	18447	115	705	230				ycf3	+	16332	18257	115	708	230	720	153
rpoC1	+	37325	40088	430	709	1625				rpoC1	+	37332	40095	430	709	1625				rpoC1	+	37283	40063	430	726	1625
atpF	+	47968	49222	172	676	407				atpF	+	47968	49222	172	676	407				atpF	+	47987	49243	172	678	407
clpP	-	66795	68014	360	632	228				clpP	-	66796	68015	360	632	228				clpP	-	67508	68725	360	630	228
petB	+	71005	72455	6	803	642				petB	+	71006	72456	6	803	642				petB	+	71737	73199	6	815	642
petD	+	72661	73855	8	712	475				petD	+	72662	73856	8	712	475				petD	+	73407	74601	8	712	475
rpl2	-	80501	82049	397	721	431				rpl2	-	80507	82055	397	721	431				rpl2	-	81225	82759	397	707	431
ndhB	-	90000	92175	721	691	764				ndhB	-	90006	92181	721	691	764				ndhB	-	90772	92941	721	685	764
trnA-UGC	+	97921	98826	38	830	38				trnA-UGC	+	97927	98832	38	830	38				trnA-UGC	+	98782	99692	38	835	38
ndhA	+	110824	113170	553	1255	539				ndhA	+	110835	113181	553	1255	539				ndhA	+	111748	114085	553	1246	539
rpl16	-	77671	79072	9	982	411				rpl16	-	77672	79072	9	981	411				trnC-ACA	-	9794	10510	41	635	41
																				trnE-UUC	+	97849	98744	33	830	33

## Sheet: Table S2
Table S3 Repeat sequences (>= 30bp) identified in three Astragalus species
Species	Code	Length	Repeat 1 Start	Type	Length	Repeat 2 Start	Mismatch	E-value
A. adsurgens	1	116	103424	F	117	103481	2	1.2e-55
	2	85	103455	F	85	103513	0	2.83e-42
	3	81	20027	F	81	22251	3	5.45e-32
	4	67	68118	P	67	121238	2	4.96e-26
	5	66	63063	P	66	63063	2	1.92e-25
	6	66	56937	F	66	57336	3	3.14e-23
	7	58	103424	F	59	103539	2	2.52e-21
	8	49	78098	P	49	112564	0	1.34e-20
	9	48	56955	F	48	57354	0	5.35e-20
	10	52	68133	P	52	121238	1	1.29e-19
	11	51	82647	F	51	82757	1	5.08e-19
	12	48	82523	F	48	83499	1	3.06e-17
	13	41	78107	F	41	93288	0	8.77e-16
	14	40	93288	P	40	112564	0	3.51e-15
	15	47	108890	P	47	108890	3	3.06e-12
	16	45	50994	P	45	50994	3	4.28e-11
	17	45	115833	P	45	115833	3	4.28e-11
	18	33	82665	F	33	82775	0	5.75e-11
	19	41	119512	P	41	119512	2	8.28e-11
	20	39	17236	P	39	78109	2	1.2e-09
	21	39	17236	P	39	93290	2	1.2e-09
	22	42	303	P	42	303	3	2.22e-09
	23	30	103416	F	30	103582	0	3.68e-09
	24	38	17237	F	38	112564	2	4.55e-09
	25	40	297	P	40	310	3	3.05e-08
	26	40	20110	F	40	22334	3	3.05e-08
	27	36	16153	P	34	52511	2	6.52e-08
	28	34	14779	F	35	14806	2	2.46e-07
	29	30	103452	F	31	103567	1	3.4e-07
	30	36	14740	P	37	94004	3	1.54e-06
	31	32	25548	F	32	52517	2	1.31e-05
	32	31	56775	P	32	94030	2	1.31e-05
	33	35	20086	F	35	22310	3	2.07e-05
	34	34	14399	R	35	53412	3	2.07e-05
	35	31	4463	F	30	29420	2	4.93e-05
	36	31	80410	R	31	80410	2	4.93e-05
	37	34	14729	F	33	18596	3	7.57e-05
	38	34	14891	C	32	94370	3	7.57e-05
	39	33	29415	C	34	54109	3	7.57e-05
	40	32	53414	P	34	94006	3	7.57e-05
	41	30	4464	C	30	54116	2	0.000184
	42	30	82646	F	30	82789	2	0.000184
	43	30	94373	R	30	94373	2	0.000184
	44	33	4434	P	32	82588	3	0.000276
	45	33	4445	C	32	18584	3	0.000276
	46	33	4448	P	31	56707	3	0.000276
	47	33	14425	P	33	109168	3	0.000276
	48	33	14741	F	32	53414	3	0.000276
	49	33	71748	P	33	90811	3	0.000276
	50	33	119424	P	31	119451	3	0.000276
Astragalus mongholicus var. dahuricus	1	116	103418	F	117	103475	2	1.2e-55
	2	85	103449	F	85	103507	0	2.83e-42
	3	81	20019	F	81	22243	3	5.44e-32
	4	67	68117	P	67	121228	2	4.96e-26
	5	66	63062	P	66	63062	2	1.92e-25
	6	66	56935	F	66	57334	3	3.13e-23
	7	58	103418	F	59	103533	2	2.51e-21
	8	49	78097	P	49	112553	0	1.34e-20
	9	48	56953	F	48	57352	0	5.35e-20
	10	52	68132	P	52	121228	1	1.29e-19
	11	51	82641	F	51	82751	1	5.08e-19
	12	48	82517	F	48	83493	1	3.06e-17
	13	41	78106	F	41	93282	0	8.76e-16
	14	40	93282	P	40	112553	0	3.5e-15
	15	47	108884	P	47	108884	3	3.05e-12
	16	45	50995	P	45	50995	3	4.27e-11
	17	45	115822	P	45	115822	3	4.27e-11
	18	33	82659	F	33	82769	0	5.74e-11
	19	41	119502	P	41	119502	2	8.28e-11
	20	39	17229	P	39	78108	2	1.2e-09
	21	39	17229	P	39	93284	2	1.2e-09
	22	42	303	P	42	303	3	2.21e-09
	23	30	103410	F	30	103576	0	3.67e-09
	24	38	17230	F	38	112553	2	4.54e-09
	25	40	297	P	40	310	3	3.05e-08
	26	40	20102	F	40	22326	3	3.05e-08
	27	36	14664	R	36	14664	2	6.51e-08
	28	36	16146	P	34	52512	2	6.51e-08
	29	30	103446	F	31	103561	1	3.39e-07
	30	36	14761	P	37	93998	3	1.53e-06
	31	32	25540	F	32	52518	2	1.31e-05
	32	31	56774	P	32	94024	2	1.31e-05
	33	35	20078	F	35	22302	3	2.07e-05
	34	34	14404	R	35	53412	3	2.07e-05
	35	31	4464	F	30	29413	2	4.92e-05
	36	34	14750	F	33	18588	3	7.56e-05
	37	34	14884	C	32	94364	3	7.56e-05
	38	33	29408	C	34	54109	3	7.56e-05
	39	32	53414	P	34	94000	3	7.56e-05
	40	30	4465	C	30	54116	2	0.000184
	41	30	82640	F	30	82783	2	0.000184
	42	30	94367	R	30	94367	2	0.000184
	43	33	4435	P	32	82582	3	0.000276
	44	33	4446	C	32	18576	3	0.000276
	45	33	4449	P	31	56706	3	0.000276
	46	33	12986	F	32	14679	3	0.000276
	47	33	14430	P	33	109162	3	0.000276
	48	33	14667	R	33	93985	3	0.000276
	49	33	14762	F	32	53414	3	0.000276
	50	33	71747	P	33	90805	3	0.000276
A. melilotoides	1	82	104294	F	81	104346	2	7.04e-35
	2	81	19846	F	81	22070	2	2.75e-34
	3	70	104306	F	69	104358	1	2.57e-30
	4	72	104304	F	73	104354	3	2.64e-27
	5	67	68828	P	67	122100	2	5.03e-26
	6	59	83333	F	59	83388	2	2.55e-21
	7	49	78858	P	49	113468	0	1.36e-20
	8	53	299	P	53	299	1	3.35e-20
	9	48	83220	F	48	84225	0	5.43e-20
	10	47	64040	F	47	64085	0	2.17e-19
	11	44	120281	P	44	120281	0	1.39e-17
	12	41	78867	F	41	94052	0	8.89e-16
	13	40	94052	P	40	113468	0	3.56e-15
	14	38	120277	P	38	120277	0	5.69e-14
	15	49	4471	R	50	4483	3	5.85e-14
	16	49	120266	P	48	120277	3	2.2e-13
	17	48	57092	F	48	57500	3	8.26e-13
	18	35	104270	F	35	104307	0	3.64e-12
	19	35	104270	F	35	104359	0	3.64e-12
	20	46	95142	F	45	95168	3	1.16e-11
	21	46	120265	F	45	120280	3	1.16e-11
	22	34	120277	F	34	120291	0	1.46e-11
	23	45	51011	P	45	51011	3	4.34e-11
	24	33	18386	F	33	18415	0	5.83e-11
	25	44	120372	P	44	120372	3	1.62e-10
	26	40	95159	R	39	95174	2	3.2e-10
	27	39	17079	P	39	78869	2	1.21e-09
	28	39	17079	P	39	94054	2	1.21e-09
	29	30	33197	P	30	33197	0	3.73e-09
	30	30	120295	P	30	120295	0	3.73e-09
	31	38	17080	F	38	113468	2	4.61e-09
	32	38	95177	R	38	95177	2	4.61e-09
	33	38	120277	P	36	120277	2	4.61e-09
	34	41	19899	F	41	22123	3	8.35e-09
	35	40	19929	F	40	22153	3	3.09e-08
	36	36	15979	P	34	52654	2	6.61e-08
	37	32	107028	F	32	107040	1	8.89e-08
	38	38	53555	R	37	53559	3	4.23e-07
	39	37	4483	C	38	83303	3	4.23e-07
	40	34	33189	P	34	33189	2	9.42e-07
	41	34	120277	F	32	120293	2	9.42e-07
	42	32	120279	F	34	120291	2	9.42e-07
	43	37	83298	F	35	120282	3	1.56e-06
	44	37	83298	P	35	120289	3	1.56e-06
	45	33	4478	R	33	83312	2	3.55e-06
	46	33	90351	R	33	90351	2	3.55e-06
	47	33	104291	F	32	104395	2	3.55e-06
	48	33	107027	F	32	107040	2	3.55e-06
	49	36	4476	P	35	4480	3	5.72e-06
	50	36	4481	C	36	95152	3	5.72e-06

## Sheet: Table S3
Table S3 SSR type and number identified in three Astragalus species
SSR type	Repeats	Astragalus adsurgens	Astragalus mongholicus var. dahuricus	Astragalus melilotoides
A/T	3	-	-	-
	4	-	-	-
	5	-	-	-
	6	-	-	-
	7	-	-	-
	8	29	29	35
	9	11	11	20
	10	11	11	12
	11	7	8	12
	12	4	5	4
	13	4	1	4
	14	-	-	-
	15	-	-	-
	16	1	1	-
	17	-	-	-
	18	-	-	-
	19	-	1	-
	In total	67	67	87
	Proportion in the total SSRs (%)	51.94	51.94	59.59
TA/TA	3	-	-	-
	4	-	-	-
	5	2	2	4
	6	1	1	1
	7	-	-	1
	In total	3	3	6
	Proportion in the total SSRs (%)	2.33	2.33	4.11
AT/AT	3	-	-	-
	4	-	-	-
	5	6	6	4
	6	1	1	2
	7	-	-	-
	8	1	1	-
	9	1	1	-
	In total	9	9	6
	Proportion in the total SSRs (%)	6.98	6.98	4.11
ATA/TAT	3	-	-	-
	4	-	-	3
	In total	-	-	3
	Proportion in the total SSRs (%)	-	-	2.05
AAT/ATT	3	-	-	-
	4	1	1	-
	In total	1	1	-
	Proportion in the total SSRs (%)	0.77	0.77	-
TTA/TAA	3	-	-	-
	4	-	-	-
	In total	-	-	-
	Proportion in the total SSRs (%)	-	-	-
ATT/AAT	3	-	-	-
	4	1	1	-
	In total	1	1	-
	Proportion in the total SSRs (%)	0.77	0.77	-
TAA/TTA	3	-	-	-
	4	-	-	1
	In total	-	-	1
	Proportion in the total SSRs (%)	-	-	0.68
ATAG/CTAT	3	-	-	1
	In total	-	-	1
	Proportion in the total SSRs (%)	-	-	0.68
TATT/AATA	3	-	-	1
	In total	-	-	1
	Proportion in the total SSRs (%)	-	-	0.68
AGGT/ACCT	3	1	1	1
	In total	1	1	1
	Proportion in the total SSRs (%)	0.77	0.77	0.68
TTTA/TAAA	3	1	-	1
	4	-	1	-
	In total	1	1	1
	Proportion in the total SSRs (%)	0.77	0.77	0.68
ATCA/TGAT	3	1	1	-
	In total	1	1	-
	Proportion in the total SSRs (%)	0.77	0.77	-
CTTA/TAAG	3	1	1	-
	In total	1	1	-
	Proportion in the total SSRs (%)	0.77	0.77	-
TTTC/GAAA	3	1	1	-
	In total	1	1	-
	Proportion in the total SSRs (%)	0.77	0.77	-
AATA/TATT	3	-	-	1
	In total	-	-	1
	Proportion in the total SSRs (%)	-	-	0.68
ATTT/AAAT	3	-	-	1
	In total	-	-	1
	Proportion in the total SSRs (%)	-	-	0.68
TTTA/TAAA	3	-	-	1
	In total	-	-	1
	Proportion in the total SSRs (%)	-	-	0.68
AATTA/TAATT	3	1	1	-
	In total	1	1	-
	Proportion in the total SSRs (%)	0.77	0.77	-
ATATA/TATAT	3	-	-	1
	In total	-	-	1
	Proportion in the total SSRs (%)	-	-	0.68
TTCGAC/GTCGAA	3	-	-	1
	In total	-	-	1
	Proportion in the total SSRs (%)	-	-	0.68
Number of SSRs present in compound formation	-	42	42	34
	Proportion in the total SSRs	32.56	32.56	23.29
In total	-	129	129	146

## Sheet: Table S4
Table S4 dN and dS paired comparisons among four species
	Ada-Aad					Ame-Aad					Ame-Ada					Amo-Aad					Amo-Ada					AMO-Ame
Name	dN	dN(se)	dS	dS(se)	dN/dS	dN	dN(se)	dS	dS(se)	dN/dS	dN	dN(se)	dS	dS(se)	dN/dS	dN	dN(se)	dS	dS(se)	dN/dS	dN	dN(se)	dS	dS(se)	dN/dS	dN	dN(se)	dS	dS(se)	dN/dS
accD	0	0	0	0	/	0.0176	0.004	0.0622	0.017	0.282958	0.0176	0.004	0.0622	0.017	0.282958	0.0148	0.0037	0.0343	0.0122	0.431487	0.0148	0.0037	0.0343	0.0122	0.431487	0.0073	0.0026	0.0449	0.0144	0.162584
atpA	0	0	0	0	/	0.0033	0.0017	0.0522	0.0522	0.0632184	0.0033	0.0017	0.0522	0.0522	0.0632184	0.0025	0.0014	0.032	0.0102	0.078125	0.0025	0.0014	0.032	0.0102	0.078125	0.0025	0.0014	0.0357	0.0109	0.070028
atpB	0	0	0.003	0.003	0	0.0053	0.0022	0.0248	0.0089	0.21371	0.0053	0.0022	0.0248	0.0089	0.21371	0.0035	0.0018	0.0185	0.0076	0.189189	0.0035	0.0018	0.0185	0.0076	0.189189	0.0018	0.0012	0.0122	0.0061	0.147541
atpE	0	0	0	0	/	0.0131	0.0066	0.0243	0.0173	0.539095	0.0131	0.0066	0.0243	0.0173	0.539095	0.0098	0.0057	0	0	/	0.0098	0.0057	0	0	/	0.0032	0.0032	0.0242	0.0172	0.132231
atpF	0	0	0	0	/	0.0046	0.0033	0.0143	0.0101	0.321678	0.0046	0.0033	0.0143	0.0101	0.321678	0.0046	0.0033	0	0	/	0.0046	0.0033	0	0	/	0	0	0.0143	0.0102	0
atpH	0	0	0	0	/	0.0057	0.0057	0.0853	0.0391	0.066823	0.0057	0.0057	0.0853	0.0391	0.066823	0	0	0.067	0.034	0	0	0	0.067	0.034	0	0.0057	0.0057	0.0162	0.0162	0.351852
atpI	0	0	0	0	/	0.0035	0.0025	0.0312	0.014	0.112179	0.0035	0.0025	0.0312	0.014	0.112179	0.0052	0.003	0.0315	0.0142	0.165079	0.0052	0.003	0.0315	0.0142	0.165079	0.0017	0.0017	0.0124	0.0088	0.137097
ccsA	0	0	0	0	/	0.0053	0.0026	0.0364	0.0139	0.145604	0.0053	0.0026	0.0364	0.0139	0.145604	0.0066	0.003	0.0467	0.0157	0.141328	0.0066	0.003	0.0467	0.0157	0.141328	0.0013	0.0013	0.0204	0.0102	0.0637255
cemA	0	0	0	0	/	0.0182	0.0061	0.011	0.0078	1.65455	0.0182	0.0061	0.011	0.0078	1.65455	0.0121	0.0049	0.011	0.0078	1.1	0.0121	0.0049	0.011	0.0078	1.1	0.0141	0.0054	0	0	/
clpP	0	0	0	0	/	0.0068	0.004	0.0314	0.0158	0.216561	0.0068	0.004	0.0314	0.0158	0.216561	0.0137	0.0056	0.0157	0.0111	0.872611	0.0137	0.0056	0.0157	0.0111	0.872611	0.0069	0.004	0.0312	0.0157	0.221154
matK	0	0	0	0	/	0.0057	0.0022	0.0389	0.0118	0.14653	0.0057	0.0022	0.0389	0.0118	0.14653	0.0057	0.0022	0.0352	0.0112	0.161932	0.0057	0.0022	0.0352	0.0112	0.161932	0.0049	0.002	0.017	0.0077	0.288235
ndhA	0	0	0	0	/	0.0049	0.0034	0.0162	0.0115	0.302469	0.0049	0.0034	0.0162	0.0115	0.302469	0.0049	0.0034	0.0246	0.0142	0.199187	0.0049	0.0034	0.0246	0.0142	0.199187	0	0	0.008	0.008	0
ndhB	0	0	0	0	/	0.0055	0.0023	0.0205	0.0073	0.268293	0.0055	0.0023	0.0205	0.0073	0.268293	0.0009	0.0009	0.0153	0.0063	0.0588235	0.0009	0.0009	0.0153	0.0063	0.0588235	0.0046	0.0021	0.0206	0.0073	0.223301
ndhC	0	0	0	0	/	0.0036	0.0036	0	0	/	0.0036	0.0036	0	0	/	0.0073	0.0051	0.0126	0.0127	0.579365	0.0073	0.0051	0.0126	0.0127	0.579365	0.0036	0.0036	0.0125	0.0126	0.288
ndhD	0	0	0	0	/	0.0018	0.0012	0.0235	0.0083	0.0765957	0.0018	0.0012	0.0235	0.0083	0.0765957	0.0009	0.0009	0.0058	0.0041	0.155172	0.0009	0.0009	0.0058	0.0041	0.155172	0.0009	0.0009	0.0175	0.0072	0.0514286
ndhE	0	0	0	0	/	0	0	0.0159	0.0159	0	0	0	0.0159	0.0159	0	0	0	0.0159	0.0159	0	0	0	0.0159	0.0159	0	0	0	0	0	/
ndhF	0	0	0	0	/	0.0055	0.0017	0.0272	0.0083	0.202206	0.0055	0.0017	0.0272	0.0083	0.202206	0.0044	0.0016	0.0195	0.0069	0.225641	0.0044	0.0016	0.0195	0.0069	0.225641	0.0044	0.0016	0.0171	0.0065	0.25731
ndhG	0	0	0	0	/	0	0	0	0	/	0	0	0	0	/	0	0	0.0086	0.0086	0	0	0	0.0086	0.0086	0	0	0	0.0086	0.0086	0
ndhH	0	0	0	0	/	0.0021	0.0015	0.0399	0.0134	0.0526316	0.0021	0.0015	0.0399	0.0134	0.0526316	0.0011	0.0011	0.0262	0.0108	0.0419847	0.0011	0.0011	0.0262	0.0108	0.0419847	0.0011	0.0011	0.031	0.0118	0.0354839
ndhI	0	0	0	0	/	0	0	0.0226	0.0161	0	0	0	0.0226	0.0161	0	0	0	0	0	/	0	0	0	0	/	0	0	0.0226	0.0161	0
ndhJ	0	0	0	0	/	0	0	0.0204	0.0144	0	0	0	0.0204	0.0144	0	0	0	0.0204	0.0144	0	0	0	0.0204	0.0144	0	0	0	0	0	/
ndhK	0	0	0	0	/	0.0059	0.0034	0	0	/	0.0059	0.0034	0	0	/	0.0039	0.0028	0.0074	0.0075	0.527027	0.0039	0.0028	0.0074	0.0075	0.527027	0.0059	0.0034	0.0074	0.0075	0.797297
petA	0	0	0	0	/	0.0027	0.0019	0.0492	0.0157	0.054878	0.0027	0.0019	0.0492	0.0157	0.054878	0.004	0.0023	0.0441	0.0148	0.0907029	0.004	0.0023	0.0441	0.0148	0.0907029	0.0013	0.0013	0.0344	0.0132	0.0377907
petB	0	0	0	0	/	0.002	0.002	0.0268	0.0135	0.0746269	0.002	0.002	0.0268	0.0135	0.0746269	0.0051	0.0032	0.0236	0.0127	0.216102	0.0051	0.0032	0.0236	0.0127	0.216102	0.0071	0.0038	0.0235	0.0126	0.302128
petD	0	0	0	0	/	0.0027	0.0027	0.0651	0.0252	0.0414747	0.0027	0.0027	0.0651	0.0252	0.0414747	0.0138	0.0062	0.0554	0.0231	0.249097	0.0138	0.0062	0.0554	0.0231	0.249097	0.011	0.0055	0.0269	0.0156	0.408922
petG	0	0	0	0	/	0	0	0	0	/	0	0	0	0	/	0	0	0	0	/	0	0	0	0	/	0	0	0	0	/
petL	0	0	0	0	/	0	0	0	0	/	0	0	0	0	/	0.0158	0.0159	0	0	/	0.0158	0.0159	0	0	/	0.0158	0.0159	0	0	/
petN	0	0	0	0	/	0	0	0	0	/	0	0	0	0	/	0	0	0.055	0.0555	0	0	0	0.055	0.0555	0	0	0	0.055	0.0555	0
psaA	0	0	0	0	/	0.0012	0.0008	0.0287	0.0074	0.0418118	0.0012	0.0008	0.0287	0.0074	0.0418118	0	0	0.0189	0.006	0	0	0	0.0189	0.006	0	0.0012	0.0008	0.0113	0.0046	0.106195
psaB	0	0	0	0	/	0.0006	0.0006	0.0196	0.0066	0.0306122	0.0006	0.0006	0.0196	0.0066	0.0306122	0.0006	0.0006	0.0174	0.0062	0.0344828	0.0006	0.0006	0.0174	0.0062	0.0344828	0.0012	0.0008	0.024	0.0073	0.05
psaC	0	0	0	0	/	0	0	0.0211	0.0212	0	0	0	0.0211	0.0212	0	0	0	0.0205	0.0206	0	0	0	0.0205	0.0206	0	0	0	0.0426	0.0304	0
psaI	0	0	0	0	/	0.0139	0.0139	0.093	0.0679	0.149462	0.0139	0.0139	0.093	0.0679	0.149462	0	0	0	0	/	0	0	0	0	/	0.0139	0.0139	0.093	0.0679	0.149462
psaJ	0	0	0	0	/	0	0	0	0	/	0	0	0	0	/	0	0	0.0456	0.0325	0	0	0	0.0456	0.0325	0	0	0	0.0456	0.0325	0
psbA	0	0	0	0	/	0	0	0.0121	0.007	0	0	0	0.0121	0.007	0	0	0	0.0162	0.0081	0	0	0	0.0162	0.0081	0	0	0	0.004	0.004	0
psbB	0	0	0	0	/	0.0017	0.0012	0.0271	0.0091	0.0627306	0.0017	0.0012	0.0271	0.0091	0.0627306	0.0009	0.0009	0.0267	0.009	0.0337079	0.0009	0.0009	0.0267	0.009	0.0337079	0.0008	0.0008	0.0301	0.0096	0.0265781
psbC	0	0	0	0	/	0.0018	0.0013	0.0151	0.0068	0.119205	0.0018	0.0013	0.0151	0.0068	0.119205	0.0028	0.0016	0.012	0.006	0.233333	0.0028	0.0016	0.012	0.006	0.233333	0.0009	0.0009	0.009	0.0052	0.1
psbD	0	0	0	0	/	0	0	0.0268	0.0102	0	0	0	0.0268	0.0102	0	0	0	0.0189	0.0085	0	0	0	0.0189	0.0085	0	0	0	0.0075	0.0053	0
psbE	0	0	0	0	/	0	0	0.016	0.016	0	0	0	0.016	0.016	0	0	0	0	0	/	0	0	0	0	/	0	0	0.016	0.016	0
psbF	0	0	0	0	/	0	0	0	0	/	0	0	0	0	/	0.0057	0.0057	0.0264	0.0265	0.215909	0	0	0	0	/	0	0	0	0	/
psbH	0	0	0	0	/	0.0057	0.0057	0.0264	0.0265	0.215909	0.0057	0.0057	0.0264	0.0265	0.215909	0	0	0	0	/	0	0	0	0	/	0.0057	0.0057	0.0264	0.0265	0.215909
psbI	0	0	0	0	/	0	0	0.0349	0.0352	0	0	0	0.0349	0.0352	0	0	0	0.0349	0.0352	0	0	0	0.0349	0.0352	0	0	0	0	0	/
psbJ	0	0	0	0	/	0	0	0	0	/	0	0	0	0	/	0	0	0	0	/	0	0	0	0	/	0	0	0	0	/
psbK	0	0	0	0	/	0	0	0	0	/	0	0	0	0	/	0	0	0.0236	0.0238	0	0	0	0.0236	0.0238	0	0	0	0.0236	0.0238	0
psbL	0	0	0	0	/	0	0	0.0365	0.0368	0	0	0	0.0365	0.0368	0	0	0	0.0365	0.0368	0	0	0	0.0365	0.0368	0	0	0	0	0	/
psbM	0	0	0	0	/	0	0	0.0423	0.0426	0	0	0	0.0423	0.0426	0	0	0	0.0423	0.0426	0	0	0	0.0423	0.0426	0	0	0	0	0	/
psbN	0	0	0	0	/	0	0	0.0319	0.0321	0	0	0	0.0319	0.0321	0	0	0	0.0319	0.0321	0	0	0	0.0319	0.0321	0	0	0	0	0	/
psbT	0	0	0	0	/	0	0	0.0326	0.033	0	0	0	0.0326	0.033	0	0	0	0.0326	0.033	0	0	0	0.0326	0.033	0	0	0	0	0	/
psbZ	0	0	0	0	/	0	0	0.1182	0.061	0	0	0	0.1182	0.061	0	0	0	0.1755	0.0752	0	0	0	0.1755	0.0752	0	0	0	0.0526	0.0377	0
rbcL	0	0	0.0036	0.0036	0	0.0141	0.0035	0.0643	0.0159	0.219285	0.0141	0.0035	0.0601	0.0153	0.234609	0.0159	0.0038	0.0406	0.0124	0.391626	0.0159	0.0038	0.0405	0.0123	0.392593	0.0106	0.0031	0.0406	0.0124	0.261084
rpl2	0	0	0	0	/	0.008	0.0036	0.0652	0.0191	0.122699	0.008	0.0036	0.0652	0.0191	0.122699	0.0064	0.0032	0.0598	0.0182	0.107023	0.0064	0.0032	0.0598	0.0182	0.107023	0.008	0.0036	0.0371	0.0141	0.215633
rpl14	0	0	0	0	/	0.0033	0.0034	0.066	0.0335	0.05	0.0033	0.0034	0.066	0.0335	0.05	0	0	0.0497	0.0292	0	0	0	0.0497	0.0292	0	0.0033	0.0033	0.016	0.0161	0.20625
rpl16	0	0	0	0	/	0.0032	0.0032	0.0499	0.0252	0.0641283	0.0032	0.0032	0.0499	0.0252	0.0641283	0.0064	0.0045	0	0	/	0.0064	0.0045	0	0	/	0.0032	0.0032	0.0501	0.0253	0.0638723
rpl20	0	0	0	0	/	0.0222	0.0091	0.0421	0.0246	0.527316	0.0222	0.0091	0.0421	0.0246	0.527316	0.0184	0.0083	0.0427	0.025	0.430913	0.0184	0.0083	0.0427	0.025	0.430913	0.0184	0.0082	0.0283	0.0201	0.650177
rpl23	0	0	0	0	/	0	0	0.017	0.017	0	0	0	0.017	0.017	0	0	0	0.034	0.0242	0	0	0	0.034	0.0242	0	0	0	0.0167	0.0168	0
rpl32	0	0	0	0	/	0.0187	0.0133	0.0539	0.0386	0.346939	0.0187	0.0133	0.0539	0.0386	0.346939	0.0185	0.0131	0.0867	0.0515	0.213379	0.0185	0.0131	0.0867	0.0515	0.213379	0	0	0.0273	0.0274	0
rpl33	0	0	0	0	/	0.0198	0.0115	0	0	/	0.0198	0.0115	0	0	/	0.0271	0.0137	0.023	0.0231	1.17826	0.0271	0.0137	0.023	0.0231	1.17826	0.02	0.0116	0.0482	0.0344	0.414938
rpl36	0	0	0.0585	0.0596	0	0	0	0.0585	0.0596	0	0	0	0	0	/	0	0	0	0	/	0	0	0.0585	0.0596	0	0	0	0.0585	0.0596	0
rpoA	0.0013	0.0013	0.0297	0.0122	0.043771	0.0013	0.0013	0.0297	0.0122	0.043771	0	0	0	0	/	0.0038	0.0022	0.0245	0.011	0.155102	0.0026	0.0018	0.0146	0.0084	0.178082	0.0026	0.0018	0.0146	0.0084	0.178082
rpoB	0	0	0	0	/	0.0024	0.001	0.0303	0.0068	0.0792079	0.0024	0.001	0.0303	0.0068	0.0792079	0.002	0.0009	0.0211	0.0057	0.0947867	0.002	0.0009	0.0211	0.0057	0.0947867	0.0016	0.0008	0.0179	0.0052	0.0893855
rpoC1	0	0	0	0	/	0.0037	0.0015	0.0397	0.01	0.093199	0.0037	0.0015	0.0397	0.01	0.093199	0.0025	0.0012	0.032	0.0089	0.078125	0.0025	0.0012	0.032	0.0089	0.078125	0.0025	0.0012	0.0293	0.0085	0.0853242
rpoC2	0	0	0	0	/	0.0107	0.0018	0.0382	0.007	0.280105	0.0107	0.0018	0.0382	0.007	0.280105	0.0066	0.0014	0.0293	0.0062	0.225256	0.0066	0.0014	0.0293	0.0062	0.225256	0.0072	0.0015	0.0345	0.0067	0.208696
rps2	0.0018	0.0018	0.0137	0.0097	0.131387	0.0018	0.0018	0.0137	0.0097	0.131387	0	0	0	0	/	0	0	0.0069	0.0069	0	0.0018	0.0018	0.0207	0.012	0.0869565	0.0018	0.0018	0.0207	0.012	0.0869565
rps3	0	0	0	0	/	0.002	0.002	0.0141	0.01	0.141844	0.002	0.002	0.0141	0.01	0.141844	0	0	0.0141	0.01	0	0	0	0.0141	0.01	0	0	0	0.007	0.007	0
rps4	0	0	0	0	/	0.0042	0.003	0.0332	0.0167	0.126506	0.0042	0.003	0.0332	0.0167	0.126506	0.0042	0.003	0.0247	0.0144	0.17004	0.0042	0.003	0.0247	0.0144	0.17004	0	0	0.0081	0.0081	0
rps7	0	0	0	0	/	0	0	0.0107	0.0107	0	0	0	0.0107	0.0107	0	0.0027	0.0027	0.0214	0.0152	0.126168	0.0027	0.0027	0.0214	0.0152	0.126168	0.0027	0.0027	0.0106	0.0106	0.254717
rps8	0.0128	0.0064	0.0494	0.0251	0.259109	0.0128	0.0064	0.0494	0.0251	0.259109	0	0	0	0	/	0.0032	0.0032	0.036	0.021	0.0888889	0.0096	0.0056	0.0366	0.0213	0.262295	0.0096	0.0056	0.0366	0.0213	0.262295
rps11	0	0	0	0	/	0.0031	0.0031	0.0226	0.0161	0.137168	0.0031	0.0031	0.0226	0.0161	0.137168	0	0	0	0	/	0	0	0	0	/	0.0031	0.0031	0.0226	0.0161	0.137168
rps12	0	0	0	0	/	0.0073	0.0052	0.0581	0.0266	0.125645	0.0073	0.0052	0.0581	0.0266	0.125645	0.0079	0.0054	0.0559	0.0258	0.141324	0.0079	0.0054	0.0559	0.0258	0.141324	0.0152	0.0075	0.0209	0.0155	0.727273
rps14	0	0	0	0	/	0.0044	0.0044	0.0445	0.0259	0.0988764	0.0044	0.0044	0.0445	0.0259	0.0988764	0	0	0.0432	0.0251	0	0	0	0.0432	0.0251	0	0.0045	0.0045	0.0281	0.02	0.160142
rps15	0.0046	0.0047	0	0	/	0.0093	0.0066	0	0	/	0.014	0.0081	0	0	/	0.0093	0.0066	0.0196	0.0197	0.47449	0.0141	0.0081	0.0196	0.0197	0.719388	0	0	0.0197	0.0197	0
rps18	0	0	0.028	0.0199	0	0	0	0.028	0.0199	0	0	0	0	0	/	0	0	0	0	/	0	0	0.028	0.0199	0	0	0	0.028	0.0199	0
rps19	0	0	0	0	/	0	0	0.04	0.0285	0	0	0	0.04	0.0285	0	0	0	0.04	0.0285	0	0	0	0.04	0.0285	0	0	0	0	0	/
ycf2	0	0	0	0	/	0.028	0.0026	0.0447	0.0065	0.626398	0.028	0.0026	0.0447	0.0065	0.626398	0.0213	0.0023	0.0259	0.0048	0	0.0213	0.0023	0.0259	0.0048	0	0.0179	0.0021	0.0247	0.0047	0.724696
ycf3	0	0	0	0	/	0	0	0.0871	0.0315	0	0	0	0.0871	0.0315	0	0	0	0.0517	0.0234	0	0	0	0.0517	0.0234	0	0	0	0.0525	0.0238	0

## Sheet: Table S5
Table S5 Species used for polygenetic analysis
Code	GenBank accession numbers	Species	Genus	Tribe	Subfamily
1	MW719854	Astragalus adsurgens	Astragalus	Galegeae	Papilionoideae
2	MW719855	Astragalus melilotoides
3	MW719856	Astragalus mongholicus var. dahuricus
4	NC_029828.1	Astragalus mongholicus
5	NC_028171.1	Astragalus nakaianus
6	NC_047381.1	Astragalus bhotanensis
7	NC_047251.1	Astragalus gummifer
8	NC_050861.1	Oxytropis arctobia	Oxytropis
9	NC_050860.1	Oxytropis splendens
10	NC_011163.1	Cicer arietinum	Cicer	Cicereae
11	NC_027149.1	Lathyrus inconspicuus	Lathyrus	Vicieae
12	NC_027075.1	Lathyrus japonicus
13	NC_014063.1	Lathyrus sativus
14	NC_027153.1	Medicago hybrida	Medicago	Trifolieae
15	NC_027154.1	Medicago papillosa
16	NC_025744.1	Trifolium glanduliferum	Trifolium
17	NC_024166.1	Trifolium meduseum
18	NC_024036.1	Trifolium repens
19	NC_025745.1	Trifolium strictum
20	NC_027155.1	Vicia sativa	Vigna	Phaseoleae
21	NC_027677.1	Wisteria floribunda	Wisteria	Tephrosieae
22	NC_029406.1	Wisteria sinensis
23	NC_000932.1	Arabidopsis thaliana	Arabidopsis	Arabideae	Outgroups
24	NC_001879.2	Nicotiana tabacum	Nicotiana	Cestreae
